# Supplementary material
Source: Springer Nature journal article supplement (https://www.springermedizin.de/resource/supplementary/13075_2010_3223_MOESM4_ESM.pdf/9693950)
Supplement: MOESM4 [file 9693950]

A. Part A – Intravenous Administration

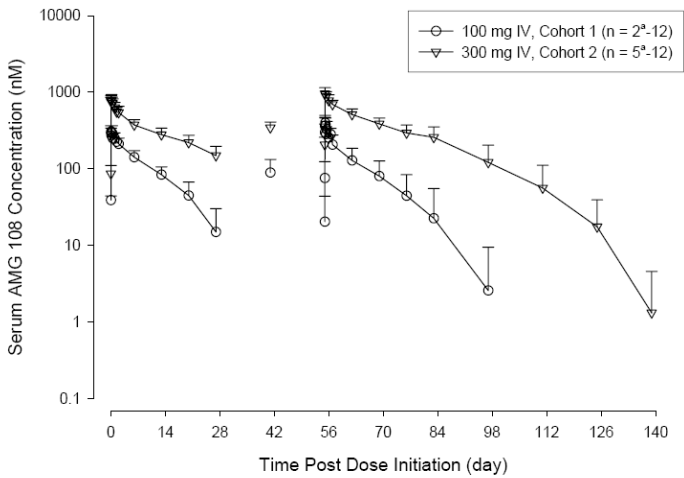

B. Part A – Subcutaneous Administration

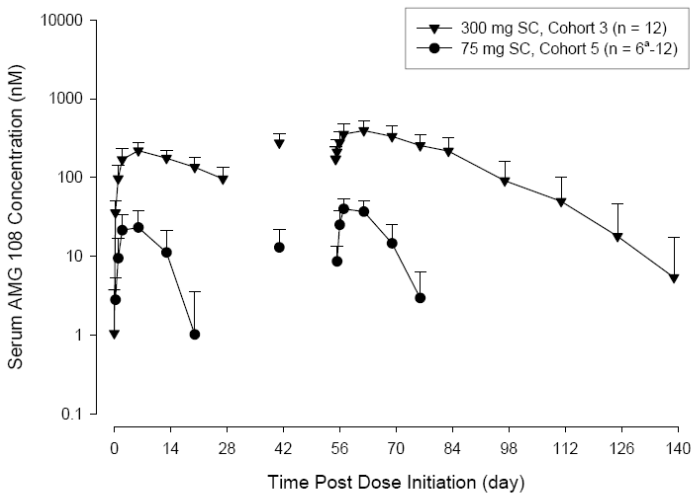

C. Part B – Subcutaneous Administration

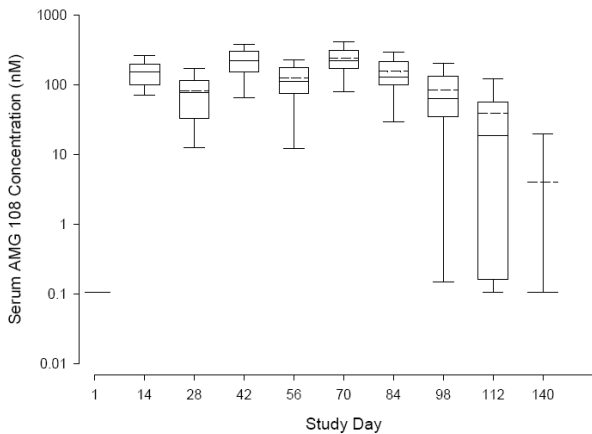

Note: Box plots show median (solid line), mean (dashed line), 5<sup>th</sup>, 25<sup>th</sup>, 75<sup>th</sup>, and 95<sup>th</sup> percentiles. For graphical clarity, the LLOQ (0.106 nM) was entered for below the quantification level (BQL) values. Outliers are not shown.
